# Supplementary material for: Hard-to-Heal Wound Healing: Superiority of Hydrogel EHO-85 (Containing Olea europaea Leaf Extract) vs. a Standard Hydrogel. A Randomized Controlled Trial
Source: MDPI journal article supplement (doi:10.3390/gels9120962), 2023-12-08
Supplement: s1 [file s1]

**Table S1. Collaborating nurses (sub-investigators) by center**

| Clinical-trial center and principal investigator                                | Researcher nurse                      | Health center and nursing center  |
|---------------------------------------------------------------------------------|---------------------------------------|-----------------------------------|
| <b>Centro Salud Aeropuerto</b><br>Concepción Mansilla Pedregosa (PI)            | Alberto Garrido Arroyo                | Centro Salud Aeropuerto           |
|                                                                                 | Mercedes Garrido Aranda               | Centro Salud Aeropuerto           |
|                                                                                 | María José Ibáñez Fernández           | Centro Salud Aeropuerto           |
|                                                                                 | María José Millán Ayala               | Centro Salud Aeropuerto           |
|                                                                                 | Pilar Lucena Díaz                     | Centro Salud Aeropuerto           |
|                                                                                 | Dolores Lozano Mesas                  | Centro Salud Aeropuerto           |
|                                                                                 | Rosa M <sup>a</sup> Coronado Molina   | Centro Salud Aeropuerto           |
|                                                                                 | Rosa M <sup>a</sup> Martínez Guillén  | Centro Salud Aeropuerto           |
|                                                                                 | Aileen M <sup>a</sup> Serrano Ramón   | Centro Salud Aeropuerto           |
|                                                                                 | Gema M <sup>a</sup> Delis Carrión     | Centro Salud Aeropuerto           |
|                                                                                 | Aurora Alameda López                  | Centro Salud Aeropuerto           |
| <b>Centro Salud Castilla del Pino</b><br>Raquel M <sup>a</sup> López López (PI) | Amelia Sanjuan Espiñeira              | Centro Salud Castilla del Pino    |
|                                                                                 | Eulalia Navarro Juan                  | Centro Salud Castilla del Pino    |
|                                                                                 | Fernanda Casado Salinas               | Centro Salud Castilla del Pino    |
|                                                                                 | María Angeles Reinoso Araque          | Centro Salud Castilla del Pino    |
|                                                                                 | Alejandro Contreras Beato             | Centro Salud Castilla del Pino    |
|                                                                                 | Francisco Viana Miranda               | Centro Salud Castilla del Pino    |
|                                                                                 | Exiquio Murillo Sánchez               | Centro Salud Castilla del Pino    |
|                                                                                 | Isabel María Luque Huertas            | Centro Salud Castilla del Pino    |
|                                                                                 | Mónica Merlo Viso                     | Centro Salud Castilla del Pino    |
|                                                                                 | Pedro Andrés Galey Chica              | Consultorio La Marina - Figueroa  |
|                                                                                 | Francisco José Vidal Maestre          | Residencia Vitalia - San Rafael   |
|                                                                                 | Natalia Acosta Ceballos               | Residencia Vitalia - San Rafael   |
|                                                                                 | Marta Izquierdo Prados                | Residencia Vitalia - San Rafael   |
|                                                                                 | María Reyes Bravo                     | Residencia Vitalia - San Rafael   |
|                                                                                 | Carmen Burg Gómez de Mercado          | Residencia FEPAMIC                |
|                                                                                 | María Inmaculada González Muñoz       | Residencia FEPAMIC                |
|                                                                                 | Ana María Pérez de la Lastra Zamorano | Residencia FEPAMIC                |
|                                                                                 | Tamara Albañil Frías                  | Residencia FEPAMIC                |
|                                                                                 | Ana María Crespo Clavellina           | Residencia FEPAMIC                |
|                                                                                 | Dr. Jose María Jiménez Páez           | Residencia Figueroa               |
|                                                                                 | María Dolores Salamanca Bautista      | Residencia Figueroa               |
| <b>Centro Salud Centro de Córdoba</b><br>Juan Antonio Rodríguez Salamanca (PI)  | Lourdes García Vázquez                | Centro Salud Centro de Córdoba    |
|                                                                                 | Gema Ordóñez Romero                   | Centro Salud Centro de Córdoba    |
|                                                                                 | Juana Valle Campos                    | Centro Salud Centro de Córdoba    |
|                                                                                 | Gloria Martínez Galera                | Centro Salud Centro de Córdoba    |
|                                                                                 | Inmaculada Ruiz Prieto                | Centro Salud Centro de Córdoba    |
|                                                                                 | Cristina Gil Muñoz                    | Centro Salud Centro de Córdoba    |
|                                                                                 | Inmaculada García Gómez               | Centro Salud Centro de Córdoba    |
|                                                                                 | Estefanía Montiel García              | Centro Salud Centro de Córdoba    |
|                                                                                 | Inmaculada López Barranco             | Centro Salud Centro de Córdoba    |
|                                                                                 | Cristina Varo Cadenas                 | Residencia Virgen de los Dolores  |
| <b>Centro Salud Fuensanta</b><br>Antonia Domínguez Ramírez (PI)                 | Amalia Pastrana Sánchez Crespo        | Centro Salud Fuensanta            |
|                                                                                 | María Jose Muñoz Urbano               | Centro Salud Fuensanta            |
|                                                                                 | Inmaculada Algar Algar                | Centro Salud Fuensanta            |
|                                                                                 | María Elena Fernández Díaz            | Centro Salud Fuensanta            |
|                                                                                 | Nieves Díaz Sedano                    | Centro Salud Fuensanta            |
|                                                                                 | Jose Fernando Cejas Delgado           | Centro Salud Fuensanta            |
|                                                                                 | Elena Ponferrada León                 | Centro Salud Fuensanta            |
|                                                                                 | María Jesus Jiménez Canales           | Centro Salud Fuensanta            |
|                                                                                 | Carmen Sánchez Pérez                  | Consultorio Los Angeles (Alcolea) |
|                                                                                 | Jesús Vicente Murcia Martínez         | Residencia El Yate (Alcolea)      |
| <b>Centro Salud Guadalquivir</b><br>Feliciano Santos Blanco (PI)                | María del Carmen Heredia Lozano       | Centro Salud Guadalquivir         |
|                                                                                 | Carmen Miras García                   | Centro Salud Guadalquivir         |
|                                                                                 | Yolanda Sánchez Palomo                | Centro Salud Guadalquivir         |
|                                                                                 | Gloria Navarro Luque                  | Centro Salud Guadalquivir         |
|                                                                                 | Carmen Márquez Córdoba                | Centro Salud Guadalquivir         |
|                                                                                 | Rosa María Troyano Pérez              | Centro Salud Guadalquivir         |

| Clinical Trial Centers and Principal Investigator | Nurse researchers                         | Health-center and nursing-centers |
|---------------------------------------------------|-------------------------------------------|-----------------------------------|
| <b>Centro Salud Huerta de la Reina</b>            | Jose Juan Garés Laguna                    | Centro Salud Huerta de la Reina   |
| Francisca Cuevas Pareja (PI)                      | Adoración Muñoz Alonso                    | Centro Salud Huerta de la Reina   |
|                                                   | Fernanda Moreno Vargas                    | Centro Salud Huerta de la Reina   |
|                                                   | Ana Belén Castellano Cano                 | Centro Salud Huerta de la Reina   |
|                                                   | María Antonia Salcines Muñoz              | Centro Salud Huerta de la Reina   |
|                                                   | Francisco Escribano Villanueva            | Centro Salud Huerta de la Reina   |
|                                                   | Francisca Tocado Narganes                 | Centro Salud Huerta de la Reina   |
| <b>Centro Salud Levante Sur</b>                   | <i>Juana Pérez Valero</i>                 | Centro Salud Levante Sur          |
| <i>María Muro Guerrero (PI)</i>                   | <i>Teresa Rubio Berlanga</i>              | Centro Salud Levante Sur          |
|                                                   | <i>Margarita Madrid Querol</i>            | Centro Salud Levante Sur          |
|                                                   | <i>Eva Maria Luque Marin</i>              | Centro Salud Levante Sur          |
|                                                   | <i>Francisco Manuel Jurado Rojo</i>       | Centro Salud Levante Sur          |
|                                                   | <i>Rafaela Simoni Pedrera</i>             | Centro Salud Levante Sur          |
|                                                   | <i>Matilde Membrillo Fuentes</i>          | Centro Salud Levante Sur          |
|                                                   | <i>Antonio García Ocaña</i>               | Centro Salud Levante Sur          |
|                                                   | Francisco López Torres                    | Centro Salud Levante Sur          |
|                                                   | <i>Montserrat Encuentra Lerma</i>         | Centro Salud Levante Sur          |
|                                                   | Lidia Gutiérrez Sánchez                   | Centro Salud Levante Sur          |
|                                                   | Aurora Servanda Martínez Pérez            | Centro Salud Levante Sur          |
|                                                   | Brígida Jurado Galván                     | Centro Salud Levante Sur          |
| <b>Centro Salud Levante Norte</b>                 | Carmen Canales Salguero                   | Centro Salud Levante-Norte        |
| Antonia Carmona Priego (PI)                       | Manuel Toledano Estepa                    | Centro Salud Levante-Norte        |
|                                                   | Carmen María Fuentes Madrid               | Centro Salud Levante-Norte        |
|                                                   | Antonio Emilio Martínez Más               | Centro Salud Levante-Norte        |
|                                                   | Pilar Ortiz Morales                       | Centro Salud Levante-Norte        |
|                                                   | María Dolores Rubio González              | Centro Salud Levante-Norte        |
|                                                   | Sacramento Rosel Castro                   | Centro Salud Levante-Norte        |
|                                                   | Carmen María Rodríguez Garriguet          | Centro Salud Levante-Norte        |
|                                                   | Carmen Albañir Albalá                     | Centro Salud Levante-Norte        |
|                                                   | Belén Jiménez Holgado                     | Centro Salud Levante-Norte        |
| <b>Centro Salud Lucano</b>                        | M <sup>a</sup> Angeles Rodríguez Castillo | Centro Salud Lucano               |
| Antonio González Delgado (PI)                     | Antonia Becerra Fernandez                 | Centro Salud Lucano               |
|                                                   | Jose Manuel Fernández Granados            | Centro Salud Lucano               |
|                                                   | Manuela Hidalgo Morillo                   | Centro Salud Lucano               |
|                                                   | Antonio Jesús Cecilla Moral               | Residencia Santísima Trinidad     |
|                                                   | Matilde Cano Merlo                        | Residencia Santísima Trinidad     |
| <b>Centro Salud Occidente</b>                     | Manuela Urbano Priego                     | Centro Salud Occidente            |
| Caridad Dios Guerra (C )                          | María Dolores López Espejo                | Centro Salud Occidente            |
|                                                   | Rosalía Serrano Berni                     | Centro Salud Occidente            |
|                                                   | María Azahara García Bono                 | Centro Salud Occidente            |
|                                                   | Carmen Fernández Gutierrez                | Consultorio El Higuierón          |
|                                                   | María Salud Nieto González                | Consultorio El Higuierón          |
|                                                   | Rosario Dios Guerra                       | Consultorio Villarrubia           |
| <b>Centro Salud Poniente</b>                      | Magdalena García Carrasco                 | Centro Salud Poniente             |
| M <sup>a</sup> Dolores Marín Alfaro (PI)          | Manuel Moreno Rodríguez                   | Centro Salud Poniente             |
|                                                   | Inmaculada Guzmán Castilla                | Centro Salud Poniente             |
|                                                   | Araceli Alcaide Guirao                    | Centro Salud Poniente             |
|                                                   | Teresa Martinez de la Torre               | Centro Salud Poniente             |
|                                                   | Luis Heredia Borrego                      | Centro Salud Poniente             |
|                                                   | Rosell de la Oliva Ramírez                | Centro Salud Poniente             |
|                                                   | Sergio Garrido Bollo                      | Centro Salud Poniente             |
|                                                   | Jorge Rafael Padilla Maestre              | Centro Salud Poniente             |
|                                                   | Palmira I. Gallego Huertas                | Centro Salud Poniente             |
| <b>Centro Salud Santa Rosa</b>                    | Angela María González García              | Centro Salud Santa Rosa           |
| Santiago Cruz Velarde (PI)                        | Federico Urbano Ramirez                   | Centro Salud Santa Rosa           |
|                                                   | Milagrosa Aguilar Villalba                | Centro Salud Santa Rosa           |
|                                                   | M <sup>a</sup> Carmen Luna Poyato         | Centro Salud Santa Rosa           |
|                                                   | Sonia Calero Juárez                       | Centro Salud Santa Rosa           |
|                                                   | Cristina López Olivares                   | Residencia ORPEA Centro           |
|                                                   | Ana Pozo Olivares                         | Residencia ORPEA Centro           |
|                                                   | Juan Jose García Zamudio                  | Residencia ORPEA Centro           |
|                                                   | Teresa Ruiz López                         | Residencia ORPEA Sierra           |
|                                                   | M <sup>a</sup> Encarnación Pulido Sanchez | Consultorio Bda. El Naranjo       |



| Clinical Trial Centers and Principal Investigator | Nurse researchers                      | Health-center and nursing-centers        |
|---------------------------------------------------|----------------------------------------|------------------------------------------|
| <b>Centro Salud Sector Sur (Santa Victoria)</b>   | Rosalía Espino Navarro                 | Centro Salud Sector Sur (Santa Victoria) |
| José Tomás Linares García (PI)                    | Ezequiel Jiménez Priego                | Centro Salud Sector Sur (Santa Victoria) |
|                                                   | Jose Antonio Santaella Alcaide         | Centro Salud Sector Sur (Santa Victoria) |
|                                                   | Inés Calvo Cabrera                     | Centro Salud Sector Sur (Santa Victoria) |
|                                                   | Raquel López Valero                    | Centro Salud Sector Sur (Santa Victoria) |
|                                                   | Ana Morgado Ramírez                    | Centro Salud Sector Sur (Santa Victoria) |
| <b>Centro Salud Bujalance</b>                     | Antonia Mohedo Caballero               | Centro Salud Bujalance                   |
| Esteban Luis García Lara (PI)                     | Catalina Gómez Diaz                    | Centro Salud Bujalance                   |
|                                                   | José Ramón Serrano González            | Centro Salud Bujalance                   |
|                                                   | Antonio Luna Mantas                    | Consultorio Cañete de las Torres         |
|                                                   | Juan Antonio Quiros Blázquez           | Consultorio El Carpio                    |
|                                                   | Carmen López Jimenez                   | Consultorio Villafranca de Córdoba       |
| <b>Centro Salud Montoro</b>                       | Inmaculada Vega-Leal Bellido           | Centro Salud Montoro                     |
| Beatriz Alcalá Aguilera (PI)                      | María José Luna Romero                 | Centro Salud Montoro                     |
|                                                   | Araceli Carretero Gómez                | Centro Salud Montoro                     |
|                                                   | Amelia Camacho Buenosvinos             | Centro Salud Montoro                     |
|                                                   | Virgina González Pérez                 | Centro Salud Montoro                     |
|                                                   | María del Mar Maya Cabrera             | Residencia Jesús Nazareno                |
|                                                   | María Dolores Baeza Cerro              | Residencia Jesús Nazareno                |
|                                                   | Isabel Sánchez Gálvez                  | Residencia Jesús Nazareno                |
|                                                   | Pilar Mayorga Hortelano                | Residencia Jesús Nazareno                |
|                                                   | Joaquín Ruz Ramírez                    | Consultorio Adamuz                       |
|                                                   | María del Pilar Jurado Rueda           | Consultorio Pedro Abad                   |
|                                                   | M <sup>a</sup> Ángeles Delgado Uceda   | Consultorio Villa del Río                |
|                                                   | Cristina Gracia Rivera                 | Consultorio Villa del Río                |
|                                                   | Dolores Ramirez Carmona                | Consultorio Villa del Río                |
| <b>Centro Salud Fuente Palmera</b>                | Jesús Poyato Velasco                   | Centro Salud Fuente Palmera              |
| Marcial Caballero Arroyo (PI)                     | Maria del Valle Pavón Santacruz        | Centro Salud Fuente Palmera              |
| <b>Centro Salud La Carlota</b>                    | Antonia Cuesta Plata                   | Centro Salud La Carlota                  |
| Aranzazu Sempere Gracia (PI)                      | Enrique de la Cueva Montesinos         | Centro Salud La Carlota                  |
|                                                   | Rafael Campos López                    | Centro Salud La Carlota                  |
|                                                   | Asunción Parias Salas                  | Consultorio La Victoria                  |
| <b>Centro Salud Palma del Río</b>                 | Margarita Aguilar Berastegui           | Centro Salud Palma del Río               |
| Dolores Lopera Marín (PI)                         | M <sup>a</sup> Ángeles Jimenez Sanchez | Centro Salud Palma del Río               |
|                                                   | Rafael Molero De la Mata               | Centro Salud Palma del Río               |
|                                                   | Carlos Enrique Cabello Jaime           | Centro Salud Palma del Río               |
|                                                   | Eulalia Prieto Vilela                  | Centro Salud Palma del Río               |
|                                                   | Alonso Guerra Milla                    | Centro Salud Palma del Río               |
| <b>Centro Salud Posadas</b>                       | Ana María Molina Moreno                | Centro Salud Posadas                     |
| Antonia Quero Vilchez (PI)                        | Begoña González Vallin                 | Centro Salud Posadas                     |
|                                                   | Eva Dorado Espinosa                    | Centro Salud Posadas                     |
|                                                   | Victoria Migallón Sanchez              | Centro Salud Posadas                     |
|                                                   | Francisco Sánchez Guerrero             | Centro Salud Posadas                     |
|                                                   | Elena Gómez Moreno                     | Centro Salud Posadas                     |
|                                                   | Raquel Bravo Martínez                  | Consultorio Hornachuelos                 |
|                                                   | Isabel Luque Cantarero                 | Residencia San Bernardo                  |
|                                                   | Mónica López Muriel                    | Consultorio Los Mochos                   |
| <b>Centro Salud Montilla</b>                      | Eva María Romero Bonilla               | Centro Salud Montilla                    |
| María Dolores de la Cruz Hidalgo (PI)             | Juan Manuel Vilas Casado               | Centro Salud Montilla                    |
|                                                   | María Dolores Vilchez Gallegos         | Centro Salud Montilla                    |
|                                                   | María Luisa Clavero Berral             | Centro Salud Montilla                    |
|                                                   | Antonio Rodríguez Estepa               | Centro Salud Montilla                    |
|                                                   | Gonzalo Garramioza Robles              | Centro Salud Montilla                    |
|                                                   | Josefa Márquez Martínez                | Centro Salud Montilla                    |
|                                                   | Rosa María Salido Bellido              | Centro Salud Montilla                    |
|                                                   | Teresa Luque Llamas                    | Centro Salud Montilla                    |
|                                                   | Isabel Mengual García                  | Centro Salud Montilla                    |
|                                                   | Manuel Luque-Romero Sánchez            | Centro Salud Montilla                    |
|                                                   | Encarnación Luque Reyes                | Centro Salud Montilla                    |
|                                                   | María Felisa Luque Martínez            | Centro Salud Montilla                    |
|                                                   | Ana Isabel Calero García               | Centro Salud Montilla                    |

| Clinical Trial Centers and Principal Investigator | Nurse researchers                    | Health-center and nursing-centers |
|---------------------------------------------------|--------------------------------------|-----------------------------------|
| <b>Centro Salud Montilla (cont.)</b>              | María José Pérez Pérez               | Centro Salud Montilla             |
| María Dolores de la Cruz Hidalgo (PI)             | Marcos Bellido Sánchez               | Residencia San Juan de Dios       |
|                                                   | Verónica Galán Marín                 | Residencia San Juan de Dios       |
|                                                   | Carmen María Comino Montilla         | Residencia San Juan de Dios       |
|                                                   |                                      |                                   |
| <b>Centro Salud Lucena I y II</b>                 | Nicolasa García Gallardo             | Centro Salud Lucena               |
| Antonio José Rivas Ogalla (PI)                    | María Isabel Luna Corredera          | Centro Salud Lucena               |
|                                                   | Inmaculada Cañete Muñoz              | Centro Salud Lucena               |
|                                                   | María Luisa González Delgado         | Centro Salud Lucena               |
|                                                   | Inmaculada Jiménez Corredera         | Centro Salud Lucena               |
|                                                   | Juan B. Guerrero Muñoz               | Centro Salud Lucena               |
|                                                   | Antonio Martos Cárdenas              | Centro Salud Lucena               |
| <b>Centro Salud Cabra</b>                         | Purificación María Servian Rodríguez | Centro Salud Cabra                |
| Matilde Romero López (PI)                         | Leonardo Llado Salas                 | Centro Salud Cabra                |
|                                                   | Gertrudis Roldán Molina              | Centro Salud Cabra                |
|                                                   |                                      |                                   |
|                                                   | María Pilar Esteo Domínguez          | Centro Salud Cabra                |
|                                                   | María del Rosario Altés Comino       | Centro Salud Cabra                |
|                                                   | María Teresa Aguilar del Río         | Centro Salud Cabra                |
|                                                   | José Manuel Chacón Jiménez           | Centro Salud Cabra                |
|                                                   | María Ruz Ruiz                       | Centro Salud Cabra                |
|                                                   | María del Mar Moreno Ruiz            | Centro Salud Cabra                |
|                                                   | Juan Rabadán López                   | Centro Salud Cabra                |
|                                                   | Ana Ortiz Roldán                     | Residencia PROMI                  |
|                                                   | M <sup>a</sup> Sierra Pérez Gallego  | Residencia PROMI                  |
|                                                   | María José Cubero Muñoz              | Consultorio Doña Mencía           |
|                                                   | Angeles Lopera Parraga               | Consultorio Nueva Carteya         |
|                                                   | Alba María Pérez-Vico Contreras      | Consultorio Nueva Carteya         |
|                                                   |                                      |                                   |
| <b>Centro Salud Fernan Nuñez</b>                  | Miguel García Jiménez                | Centro Salud Fernan Nuñez         |
| Isabel Alcaide Aguilar (PI)                       | Ana Arjona Martín                    | Centro Salud Fernan Nuñez         |
|                                                   | María Angeles Carmona López          | Centro Salud Fernan Nuñez         |
|                                                   | María Jesús Pérez Cobos              | Centro Salud Fernan Nuñez         |
