# Supplementary material for: Hard-to-Heal Wound Healing: Superiority of Hydrogel EHO-85 (Containing Olea europaea Leaf Extract) vs. a Standard Hydrogel. A Randomized Controlled Trial
Source: MDPI journal article supplement (doi:10.3390/gels9120962), 2023-12-08
Supplement: s1 [file s1]

**Table S2. Exclusion criteria**

|                                                                                                                                                   |
|---------------------------------------------------------------------------------------------------------------------------------------------------|
| Diabetes mellitus with HbA1c >9.5%                                                                                                                |
| Serum albumin <2.5 g/dl                                                                                                                           |
| Severe renal insufficiency                                                                                                                        |
| Hepatic insufficiency                                                                                                                             |
| Connective-tissue disease                                                                                                                         |
| Systemic infection                                                                                                                                |
| Local-wound infection                                                                                                                             |
| Pregnancy or lactation                                                                                                                            |
| Systemic-corticosteroid therapy                                                                                                                   |
| Treatment with immunosuppressants                                                                                                                 |
| Tumor-necrosis factor (TNF) inhibitor therapy                                                                                                     |
| PPAR-gamma agonist treatment                                                                                                                      |
| In parallel, VLU and DFU had to have posterior tibial pulse and/or pedal present, and the arm-to-ankle pressure index (ABPI) had to be $\geq 0.8$ |
