# Supplementary material for: Hard-to-Heal Wound Healing: Superiority of Hydrogel EHO-85 (Containing Olea europaea Leaf Extract) vs. a Standard Hydrogel. A Randomized Controlled Trial
Source: MDPI journal article supplement (doi:10.3390/gels9120962), 2023-12-08
Supplement: s1 [file s1]

Table S3. Specific exclusion criteria for each type of ulcer

|                                                                                                                                 |
|---------------------------------------------------------------------------------------------------------------------------------|
| <b>Pressure-ulcer patients</b>                                                                                                  |
| Ulcers whose main cause is urinary or fecal incontinence.                                                                       |
| Without willingness and/or availability of caregivers to follow care guidelines during the study.                               |
| <b>Venous leg-ulcer patients</b>                                                                                                |
| History of venous surgery in previous two months.                                                                               |
| Episodes of venous thrombosis in previous three months.                                                                         |
| History of intermittent claudication in previous three months.                                                                  |
| Absence of posterior tibial and/or pedal pulse in extremity where ulcer was located.                                            |
| Ankle-brachial index (ABI) <0.8 in previous six months.                                                                         |
| Patient and/or caregivers unwilling and/or unavailable to allow daily use of compression bandage for the duration of the study. |
| <b>Diabetic- foot patients</b>                                                                                                  |
| Not diagnosed with type 1 or 2 diabetes mellitus.                                                                               |
| Ulcer with Charcot arthropathy (neuropathic arthropathy).                                                                       |
| Absence of posterior tibial and/or pedal pulse in extremity where ulcer was located.                                            |
| Ankle-brachial index (ABI) <0.8 in previous six months.                                                                         |
